# Supplementary material for: Effect of remdesivir post hospitalization for COVID-19 infection from the randomized SOLIDARITY Finland trial
Source: PubMed Central journal article supplement (PMC9579198; doi:10.1038/s41467-022-33825-5), 2022-10-18
Supplement: 41467_2022_33825_MOESM1_ESM.pdf [file 41467_2022_33825_MOESM1_ESM.pdf]

## Supplement

Effect of remdesivir post hospitalization for COVID-19 infection from the randomized SOLIDARITY Finland trial

**Supplementary Table 1.** EQ-5D-5L responses in long-term follow-up of patients who received remdesivir in the acute phase of COVID-19 infection (pages 2-3)

**Supplementary Table 2.** Dichotomized EQ-5D-5L responses as analysed (page 4)

**Supplementary Table 3.** Symptoms after one year of hospitalization between treatment arms (pages 5-7)

**Supplementary Table 4.** The effect of remdesivir plus standard of care compared to standard of care only on self-reported symptoms after one year from hospitalization due to COVID-19 infection (page 8)

**Supplementary Table 5.** The effect of remdesivir plus standard of care compared to standard of care only on recovery, stratified by the need of oxygen therapy during hospital admission (page 9)

**Code** (page 9)

**Supplementary Table 1.** EQ-5D-5L responses in long-term follow-up of patients who received remdesivir in the acute phase of COVID-19 infection

|                                  | Remdesivir,<br>n=98 (%) | SoC,<br>n=83 (%) | Both,<br>n=181 (%) |
|----------------------------------|-------------------------|------------------|--------------------|
| <b>Mobility</b>                  |                         |                  |                    |
| 1) No problems                   | 58 (59.2)               | 56 (67.5)        | 114 (63)           |
| 2) Slight problems               | 23 (23.5)               | 13 (15.7)        | 36 (19.9)          |
| 3) Moderate problems             | 10 (10.2)               | 8 (9.6)          | 18 (9.9)           |
| 4) Severe problems               | 5 (5.1)                 | 6 (7.2)          | 11 (6.1)           |
| 5) Unable to walk                | 2 (2.0)                 | 0                | 2 (1.1)            |
| <b>Self-care</b>                 |                         |                  |                    |
| 1) No problems                   | 89 (90.8)               | 73 (88.0)        | 162 (89.5)         |
| 2) Slight problems               | 6 (6.1)                 | 5 (6.0)          | 11 (6.1)           |
| 3) Moderate problems             | 0                       | 4 (4.8)          | 4 (2.2)            |
| 4) Severe problems               | 2 (2.0)                 | 1 (1.2)          | 3 (1.7)            |
| 5) Unable to wash or dress       | 1 (1.0)                 | 0                | 1 (0.6)            |
| <b>Usual activities</b>          |                         |                  |                    |
| 1) No problems                   | 66 (67.3)               | 57 (68.7)        | 123 (68.0)         |
| 2) Slight problems               | 22 (22.4)               | 14 (16.9)        | 36 (19.9)          |
| 3) Moderate problems             | 6 (6.1)                 | 6 (7.2)          | 12 (6.6)           |
| 4) Severe problems               | 4 (4.1)                 | 6 (7.2)          | 10 (5.5)           |
| 5) Unable to do usual activities | 0                       | 0                | 0                  |
| <b>Pain / discomfort</b>         |                         |                  |                    |
| 1) No pain                       | 48 (49)                 | 35 (42.2)        | 83 (45.9)          |
| 2) Slight pain                   | 35 (35.7)               | 33 (39.8)        | 68 (37.6)          |
| 3) Moderate pain                 | 11 (11.2)               | 11 (13.3)        | 22 (12.2)          |
| 4) Severe pain                   | 2 (2.0)                 | 3 (3.6)          | 5 (2.8)            |
| 5) Extreme pain                  | 2 (2.0)                 | 1 (1.2)          | 3 (1.7)            |
| <b>Anxiety / depression</b>      |                         |                  |                    |
| 1) No                            | 65 (66.3)               | 57 (68.7)        | 122 (67.4)         |
| 2) Slight                        | 24 (24.5)               | 20 (24.1)        | 44 (24.3)          |
| 3) Moderate                      | 7 (7.1)                 | 3 (3.6)          | 10 (5.5)           |

|                                                                                                                                                                                                                                                                                                     |         |         |         |
|-----------------------------------------------------------------------------------------------------------------------------------------------------------------------------------------------------------------------------------------------------------------------------------------------------|---------|---------|---------|
| 4) Severe                                                                                                                                                                                                                                                                                           | 1 (1.0) | 3 (3.6) | 4 (2.2) |
| 5) Extreme                                                                                                                                                                                                                                                                                          | 1 (1.0) | 0       | 1 (0.6) |
| <p>- EQ-5D, mobility: One patient reported both 3-4 and was classified as 4. One patient reported both 1-2 and was classified as 2.</p> <p>- EQ-5D, self-care: One patient reported both 3-4 and was treated as 4.</p> <p>- EQ-5D, pain: One patient reported both 1-2 and was classified as 2.</p> |         |         |         |

| <b>Supplementary Table 2. Dichotomized EQ-5D-5L responses as analysed</b> |                         |                  |                    |
|---------------------------------------------------------------------------|-------------------------|------------------|--------------------|
|                                                                           | Remdesivir,<br>n=98 (%) | SoC,<br>n=83 (%) | Both,<br>n=181 (%) |
| <b>Mobility</b>                                                           |                         |                  |                    |
| Outcomes 1-2                                                              | 81 (82.7)               | 69 (83.1)        | 150 (82.9)         |
| Outcomes 3-5                                                              | 17 (17.3)               | 14 (16.9)        | 31 (17.1)          |
| <b>Self-care</b>                                                          |                         |                  |                    |
| Outcomes 1-2                                                              | 95 (96.9)               | 78 (94)          | 173 (95.6)         |
| Outcomes 3-5                                                              | 3 (3.1)                 | 5 (6.0)          | 8 (4.4)            |
| <b>Usual activities</b>                                                   |                         |                  |                    |
| Outcomes 1-2                                                              | 88 (89.7)               | 71 (85.5)        | 159 (87.8)         |
| Outcomes 3-5                                                              | 10 (10.2)               | 12 (14.5)        | 22 (12.2)          |
| <b>Pain /discomfort</b>                                                   |                         |                  |                    |
| Outcomes 1-2                                                              | 83 (84.7)               | 68 (81.9)        | 151 (83.4)         |
| Outcomes 3-5                                                              | 15 (15.3)               | 15 (18.1)        | 30 (16.6)          |
| <b>Anxiety /depression</b>                                                |                         |                  |                    |
| Outcomes 1-2                                                              | 89 (90.8)               | 77 (92.8)        | 166 (91.7)         |
| Outcomes 3-5                                                              | 9 (9.1)                 | 6 (7.2)          | 15 (8.3)           |

| <b>Supplementary Table 3. Symptoms after one year of hospitalization between treatment arms</b> |                   |                     |                         |                       |
|-------------------------------------------------------------------------------------------------|-------------------|---------------------|-------------------------|-----------------------|
|                                                                                                 | No symptom<br>(0) | Mild<br>symptom (1) | Moderate<br>symptom (2) | Severe<br>symptom (3) |
| <b>Temperature</b>                                                                              |                   |                     |                         |                       |
| - Remdesivir, n (%)                                                                             | 91 (92.9)         | 7 (7.1)             | 0                       | 0                     |
| - Standard of care, n (%)                                                                       | 77 (92.8)         | 6 (7.2)             | 0                       | 0                     |
| - Total, n (%)                                                                                  | 168 (92.8)        | 13 (7.2)            | 0                       | 0                     |
| <b>Fatigue</b>                                                                                  |                   |                     |                         |                       |
| - Remdesivir, n (%)                                                                             | 42 (42.9)         | 32 (32.7)           | 17 (17.3)               | 7 (7.1)               |
| - Standard of care, n (%)                                                                       | 37 (44.6)         | 23 (27.7)           | 13 (15.7)               | 10 (12.0)             |
| - Total, n (%)                                                                                  | 79 (43.6)         | 55 (30.4)           | 30 (16.6)               | 17 (9.4)              |
| <b>Problems with attention and concentration</b>                                                |                   |                     |                         |                       |
| - Remdesivir, n (%)                                                                             | 50 (51)           | 30 (30.6)           | 8 (8.2)                 | 10 (10.2)             |
| - Standard of care, n (%)                                                                       | 47 (56.6)         | 21 (25.3)           | 9 (10.8)                | 6 (7.2)               |
| - Total, n (%)                                                                                  | 97 (53.6)         | 51 (28.2)           | 17 (9.4)                | 16 (8.8)              |
| <b>Memory difficulties and forgetting things</b>                                                |                   |                     |                         |                       |
| - Remdesivir, n (%)                                                                             | 45 (45.9)         | 32 (32.7)           | 13 (13.3)               | 8 (8.2)               |
| - Standard of care, n (%)                                                                       | 41 (49.4)         | 28 (33.7)           | 11 (13.3)               | 3 (3.6)               |
| - Total, n (%)                                                                                  | 86 (47.5)         | 60 (33.1)           | 24 (13.3)               | 11 (6.1)              |
| <b>Difficulty sleeping or falling asleep</b>                                                    |                   |                     |                         |                       |
| - Remdesivir, n (%)                                                                             | 52 (53.1)         | 32 (32.7)           | 6 (6.1)                 | 8 (8.2)               |
| - Standard of care, n (%)                                                                       | 53 (63.9)         | 14 (16.9)           | 11 (13.3)               | 5 (6.0)               |
| - Total, n (%)                                                                                  | 105 (58.0)        | 46 (25.4)           | 17 (9.4)                | 13 (7.2)              |
| <b>Depression, low spirits</b>                                                                  |                   |                     |                         |                       |
| - Remdesivir, n (%)                                                                             | 66 (67.3)         | 20 (20.4)           | 9 (9.2)                 | 3 (3.1)               |
| - Standard of care, n (%)                                                                       | 50 (60.2)         | 22 (26.5)           | 6 (7.2)                 | 5 (6.0)               |
| - Total, n (%)                                                                                  | 116 (64.1)        | 42 (23.2)           | 15 (8.3)                | 8 (4.4)               |
| <b>Mental anxiety, nervousness</b>                                                              |                   |                     |                         |                       |
| - Remdesivir, n (%)                                                                             | 65 (66.3)         | 21 (21.4)           | 9 (9.2)                 | 3 (3.1)               |
| - Standard of care, n (%)                                                                       | 59 (71.1)         | 13 (15.7)           | 7 (8.4)                 | 4 (4.8)               |
| - Total, n (%)                                                                                  | 124 (68.5)        | 34 (18.8)           | 16 (8.8)                | 7 (3.9)               |

|                                                                |            |           |          |         |
|----------------------------------------------------------------|------------|-----------|----------|---------|
| <b>Dizziness, balance problems</b>                             |            |           |          |         |
| - Remdesivir, n (%)                                            | 70 (71.4)  | 21 (21.4) | 5 (5.1)  | 2 (2.0) |
| - Standard of care, n (%)                                      | 57 (68.7)  | 20 (24.1) | 0        | 6 (7.2) |
| - Total, n (%)                                                 | 127 (70.2) | 41 (22.7) | 5 (2.8)  | 8 (4.4) |
| <b>Headache</b>                                                |            |           |          |         |
| - Remdesivir, n (%)                                            | 70 (71.4)  | 20 (20.4) | 5 (5.1)  | 3 (3.1) |
| - Standard of care, n (%)                                      | 60 (72.3)  | 14 (16.9) | 9 (10.8) | 0       |
| - Total, n (%)                                                 | 130 (71.8) | 34 (18.8) | 14 (7.7) | 3 (1.7) |
| <b>Tinnitus</b>                                                |            |           |          |         |
| - Remdesivir, n (%)                                            | 72 (73.5)  | 15 (15.3) | 7 (7.1)  | 3 (3.1) |
| - Standard of care, n (%)                                      | 59 (71.1)  | 19 (22.9) | 4 (4.8)  | 1 (1.2) |
| - Total, n (%)                                                 | 131 (72.4) | 34 (18.8) | 11 (6.1) | 4 (2.2) |
| <b><sup>a</sup>Skin sensation disorders and tingling</b>       |            |           |          |         |
| - Remdesivir, n (%)                                            | 70 (71.4)  | 18 (18.4) | 5 (5.1)  | 5 (5.1) |
| - Standard of care, n (%)                                      | 61 (73.5)  | 17 (20.5) | 5 (6.0)  | 0       |
| - Total, n (%)                                                 | 131 (72.4) | 35 (19.3) | 10 (5.5) | 5 (2.8) |
| <b>Change in the sense of smell and/or taste</b>               |            |           |          |         |
| - Remdesivir, n (%)                                            | 76 (77.6)  | 13 (13.3) | 6 (6.1)  | 3 (3.1) |
| - Standard of care, n (%)                                      | 63 (75.9)  | 16 (19.3) | 3 (3.6)  | 1 (1.2) |
| - Total, n (%)                                                 | 139 (76.8) | 29 (16.0) | 9 (5.0)  | 4 (2.2) |
| <b>Prolonged general malaise following even light exertion</b> |            |           |          |         |
| - Remdesivir, n (%)                                            | 79 (80.6)  | 14 (14.3) | 3 (3.1)  | 2 (2.0) |
| - Standard of care, n (%)                                      | 63 (75.9)  | 9 (10.8)  | 8 (9.6)  | 3 (3.6) |
| - Total                                                        | 142 (78.5) | 23 (12.7) | 11 (6.1) | 5 (2.8) |
| <b>Cardiac arrhythmias or increased resting heart rate</b>     |            |           |          |         |
| - Remdesivir, n (%)                                            | 66 (67.3)  | 24 (24.5) | 6 (6.1)  | 2 (2.0) |
| - Standard of care, n (%)                                      | 57 (68.7)  | 16 (19.3) | 7 (8.4)  | 3 (3.6) |
| - Total, n (%)                                                 | 123 (68.0) | 40 (22.1) | 13 (7.2) | 5 (2.8) |
| <b>A feeling of pressure or discomfort in the chest</b>        |            |           |          |         |
| - Remdesivir, n (%)                                            | 69 (70.4)  | 23 (23.5) | 4 (4.1)  | 2 (2.0) |

|                                                                                     |            |           |           |         |
|-------------------------------------------------------------------------------------|------------|-----------|-----------|---------|
| - Standard of care, n (%)                                                           | 66 (79.5)  | 10 (12.0) | 5 (6.0)   | 2 (2.4) |
| - Total                                                                             | 135 (74.6) | 33 (18.2) | 9 (5.0)   | 4 (2.2) |
| <b>Nausea, queasiness</b>                                                           |            |           |           |         |
| - Remdesivir, n (%)                                                                 | 85 (86.7)  | 11 (11.2) | 2 (2.0)   | 0       |
| - Standard of care, n (%)                                                           | 72 (86.7)  | 10 (12.0) | 1 (1.2)   | 0       |
| - Total, n (%)                                                                      | 157 (86.7) | 21 (11.6) | 3 (1.7)   | 0       |
| <b>Rash</b>                                                                         |            |           |           |         |
| - Remdesivir, n (%)                                                                 | 82 (83.7)  | 13 (13.3) | 2 (2.0)   | 1 (1.)  |
| - Standard of care, n (%)                                                           | 57 (68.7)  | 21 (25.3) | 4 (4.8)   | 1 (1.2) |
| - Total, n (%)                                                                      | 139 (76.8) | 34 (18.8) | 6 (3.3)   | 2 (1.1) |
| <b>Joint pain</b>                                                                   |            |           |           |         |
| - Remdesivir, n (%)                                                                 | 55 (56.1)  | 20 (20.4) | 18 (18.4) | 5 (5.1) |
| - Standard of care, n (%)                                                           | 45 (54.2)  | 21 (25.3) | 14 (16.9) | 3 (3.6) |
| - Total                                                                             | 100 (55.2) | 41 (22.7) | 32 (17.7) | 8 (4.4) |
| <b>Muscle pain</b>                                                                  |            |           |           |         |
| - Remdesivir, n (%)                                                                 | 60 (61.2)  | 27 (27.6) | 8 (8.2)   | 3 (3.1) |
| - Standard of care, n (%)                                                           | 48 (57.8)  | 22 (26.5) | 12 (14.5) | 1 (1.2) |
| - Total, n (%)                                                                      | 181 (59.7) | 49 (27.1) | 20 (11.0) | 4 (2.2) |
| <b>Persistent weekly cough</b>                                                      |            |           |           |         |
| - Remdesivir, n (%)                                                                 | 72 (73.5)  | 13 (13.3) | 12 (12.2) | 1 (1.0) |
| - Standard of care, n (%)                                                           | 62 (74.7)  | 9 (10.8)  | 9 (10.8)  | 3 (3.6) |
| - Total, n (%)                                                                      | 134 (74.0) | 22 (12.2) | 21 (11.6) | 4 (2.2) |
| <b>Persistent weekly respiratory mucus</b>                                          |            |           |           |         |
| - Remdesivir, n (%)                                                                 | 68 (69.4)  | 8 (8.2)   | 20 (20.4) | 2 (2.0) |
| - Standard of care, n (%)                                                           | 51 (61.4)  | 16 (19.3) | 13 (15.7) | 3 (3.6) |
| - Total, n (%)                                                                      | 119 (65.7) | 24 (13.3) | 33 (18.2) | 5 (2.8) |
| <sup>a</sup> With skin rash, one patient, selected both 0 and 1, and is coded as 1. |            |           |           |         |

**Supplementary Table 4.** The effect of remdesivir plus standard of care compared to standard of care only on self-reported symptoms after one year from hospitalization due to COVID-19 infection

|                                                                | Unadjusted odds ratio | 95% confidence interval |
|----------------------------------------------------------------|-----------------------|-------------------------|
| <b>Temperature</b>                                             | NA                    | NA                      |
| <b>Problems with attention and concentration</b>               | 1.02                  | 0.55-1.89               |
| <b>Memory difficulties and forgetting things</b>               | 1.27                  | 0.69-2.34               |
| <b>Difficulty sleeping or falling asleep</b>                   | 0.74                  | 0.39-1.43               |
| <b>Depression, low spirits</b>                                 | 0.92                  | 0.43-1.98               |
| <b>Mental anxiety, nervousness</b>                             | 0.92                  | 0.43-1.98               |
| <b>Dizziness, balance problems</b>                             | 0.99                  | 0.35-2.83               |
| <b>Headache</b>                                                | 0.75                  | 0.30-1.86               |
| <b>Tinnitus, i.e., ringing in the ear</b>                      | 1.71                  | 0.61-4.81               |
| <b>Skin sensation disorders and tingling</b>                   | 1.69                  | 0.61-4.76               |
| <b>Change in the sense of smell and/or taste</b>               | 1.91                  | 0.61-5.96               |
| <b>Prolonged general malaise following even light exertion</b> | 0.39                  | 0.14-1.06               |
| <b>Cardiac arrhythmias or increased resting heart rate</b>     | 0.68                  | 0.28-1.64               |
| <b>A feeling of pressure or discomfort in the chest</b>        | 0.73                  | 0.25-2.08               |
| <b>Nausea, queasiness</b>                                      | 1.69                  | 0.16-19.18              |
| <b>Rash</b>                                                    | 0.51                  | 0.13-2.06               |
| <b>Joint pain</b>                                              | 1.15                  | 0.66-2.00               |
| <b>Muscle pain</b>                                             | 0.72                  | 0.34-1.51               |
| <b>Persistent weekly cough</b>                                 | 0.92                  | 0.44-1.90               |
| <b>Persistent weekly respiratory mucus</b>                     | 1.16                  | 0.66-2.07               |

**Supplementary Table 5.** The effect of remdesivir plus standard of care compared to standard of care only on recovery, stratified by the need of oxygen therapy during hospital admission

|                                                             | Relative risk | 95% confidence interval |
|-------------------------------------------------------------|---------------|-------------------------|
| <b>Recovery in patients without oxygen during admission</b> | 0.88          | 0.65-1.18               |
| <b>Recovery in patients with oxygen during admission</b>    | 1.03          | 0.90-1.17               |

## Code

Statistical analysis was performed using RStudio. Binary outcomes were treated in a similar fashion as mortality at one year as shown below. The groups were standard of care (0) and standard of care plus remdesivir (1). The Epi-package was used.

```
library(Epi)
```

```
tmp.tab<-with(Mortality1y,t(table(Death=factor(Death1v,levels = 1:0,labels =
c("dead","alive")), Group=factor(Group,levels = 1:0) )))
```

```
twoby2(exposure=(tmp.tab))
```

```
## 2 by 2 table analysis:
## -----
## Outcome      : dead
## Comparing    : 1 vs. 0
##
##      dead alive      P(dead) 95% conf. interval
## 1      5    109      0.0439   0.0184    0.1011
## 0      5     89      0.0532   0.0223    0.1215
##
##
##                               95% conf. interval
##              Relative Risk:  0.8246    0.2461    2.7628
##              Sample Odds Ratio: 0.8165    0.2291    2.9099
## Conditional MLE Odds Ratio:  0.8173    0.1819    3.6725
##              Probability difference: -0.0093   -0.0793    0.0532
##
##              Exact P-value: 0.7575
##              Asymptotic P-value: 0.7546
## -----
```
